1 Effect of soybean molasses-adsorbents on *in vitro* ruminal fermentation characteristics, milk production  
2 performance in lactating dairy cows

3 Liang Chen<sup>1, 2</sup>, Bin Li<sup>3§</sup>, Ao Ren<sup>2</sup>, Zhiwei Kong<sup>1</sup>, Chuanshe Zhou<sup>1✉</sup>, Zhiliang Tan<sup>1</sup>,  
4 Shaoxun Tang<sup>1</sup>, Rejun Fang<sup>2✉</sup>

5

6 1 Key Laboratory for Agro-Ecological Processes in Subtropical Region, Hunan Research center of  
7 Livestock & Poultry Sciences, and South-Central Experimental Station of Animal Nutrition and Feed  
8 Science in Ministry of Agriculture, Institute of Subtropical Agriculture, The Chinese Academy of  
9 Sciences, Changsha, Hunan 410125, P.R. China.

10 2 College of Animal Science and Technology, Hunan Agricultural University, Changsha, Hunan  
11 410128, P.R. China.

12 3 Institute of Animal Husbandry and Veterinary, Tibet Autonomous Regional Academy of Agricultural  
13 Sciences, Lhasa, Tibet 850000, P.R. China.

14 § This author contributed equally to this work as co-first author

15 ✉ Corresponding author: Chuanshe Zhou, E-mail: zcs@isa.ac.cn; Tel: +86 731 84615230; Fax: +86  
16 731 84612685. Rejun Fang, E-mail: Fangrj63@126.com.

17

18 Running title: Soybean molasses-adsorbents

19

20 **Abstract:** This study aimed to evaluate the *in vitro* fermentation characteristics of corncob powder  
21 (CRP), wheat bran (WB), rice husk (RH), defatted bran (DB) and soybean hulls (SH) when mixed with  
22 soybean molasses at a ratio of 30:100 (dry matter basis), using a batch culture incubation. During *in*

23 *in vitro* study, SH showed better fermentation characteristics (including greater maximum gas production,  
24 shorter time to achieve half of  $V_f$ , greater concentrations of acetate, propionate and total VFA, and less  
25 initial fractional rate of degradation) than other four substrates, while WB had the greatest values of  
26 DM and NDF disappearance,  $\text{NH}_3\text{-N}$  and butyrate concentrations among substrates. A randomized  
27 complete block designed *in vivo* experiment was conducted with 24 Holstein cows ( $534 \pm 58$  kg BW,  
28  $2.8 \pm 0.7$  parity,  $129 \pm 23$  d in milk) randomly assigned to three experimental diets: Control, WB (WB  
29 adsorbed to soybean molasses replaced 150 g of corn meal per 1000 g of diet dry matter [DM]) or SH  
30 (SH adsorbed to soybean molasses replaced 100 g of wheat bran and 50 g corn meal per 1000 g of diet  
31 DM). The results indicated that cows received WB diet had greater ( $P<0.01$ ) milk fat and total milk  
32 solid content than cows fed control and SH diets, and cows received WB and SH diets tended to have  
33 greater ( $P<0.01$ ) milk protein content and blood glutamic-pyruvic transaminase concentration than  
34 cows fed control diet. Furtherly, cows received WB diet had greater ( $P<0.01$ ) blood amylase and  
35 lactate dehydrogenase concentration than that of cows fed control diet during middle lactation.  
36 In conclusion, dietary supplementation of molasses adsorbed by-products like WB and SH have  
37 positive effect on promoting rumen fermentation, milk quality and blood metabolism in early- and  
38 middle-lactating dairy cows. The results offered a new products and feeding way in dairy farming  
39 **Keywords:** blood metabolites; dairy cow; milk production; molasses; ruminal fermentation

## 40 **Introduction**

41 Soybean molasses is a by-product of soybean meal concentrate. The molasses byproduct results from  
42 the separation of solids and the evaporation of ethanol from the liquid fraction during the ethanol  
43 extraction processes of concentrated soybean meal. It is rich in oligosaccharides, saponins, isoflavones  
44 and other phytochemicals (Shi et al. 2013). Most of the carbohydrates can be fermented rapidly in the  
45 rumen by the microbes as energy sources, leading to efficient utilization of the rapidly degradable  
46 nitrogen fraction and greater microbial protein synthesis. The net result can be increased milk protein  
47 production.

48 Previous studies mainly focused on molasses extracted from sugarcane and beet, which have been  
49 widely used in the animal feed industry. Molasses is a sugar-containing liquid feed that can increase the  
50 ruminal fermentability of the diet, while stimulating dry matter intake (DMI) (Firkins et al., 2008). It  
51 also serves as a fat carrier in a diet and is used to enhance mixing of ingredients to prevent sorting  
52 (Murphy et al., 1997). Feeding a sugar-based product can change the ruminal fermentation pattern,  
53 decrease ruminal ammonia (NH<sub>3</sub>) concentration in dairy cows (Broderick and Radloff, 2004; Broderick  
54 et al., 2008), and increase ruminal butyrate concentration (Hristov and Ropp, 2003; DeFrain et al.,  
55 2006). It is well-known that sugars can be rapidly fermented in the rumen, theoretically leading to  
56 lactic acid production and a decline in ruminal pH, which potentially depresses fiber digestibility  
57 (Oelker et al., 2009). Martel et al. (2011) reported that dietary supplementation with cane molasses  
58 affected volatile fatty acid (VFA) concentration, milk production, and milk fat and protein yields.  
59 Furthermore, supplementation of blended molasses (50% beet sugar molasses and 50% yeast molasses)  
60 can alleviate the decrease of feed intake, and increase milk production and milk protein content in dairy  
61 cows during heat stress (Zhang, et al., 2013). Broderick and Radloff (2004) reported that replacing

62 high-moisture corn with molasses improved fiber digestibility, likely reflecting a stimulatory effect of  
63 molasses on fiber-digesting ruminal bacteria.

64 Our first hypothesis for this study using a batch culture *in vitro* fermentation technique was that  
65 WB and SH had better *in vitro* fermentation characteristics among five different feeds adsorbed to  
66 soybean molasses. and our second hypothesis for this study using lactating dairy as the experimental  
67 animals was that WB and SH have positive effect on improving milk quality and promoting blood  
68 metabolism in lactating dairy cows.

## 69 **Material & Methods**

70 The experiments were conducted according to the animal care guidelines of the Animal Care  
71 Committee, Institute of Subtropical Agriculture, The Chinese Academy of Sciences, Changsha City,  
72 Hunan Province, China (No. KYNEAAM-2006-0015).

### 73 1.1 *In vitro* experiment

#### 74 1.1.1 Fermentation substrates

75 Corncob powder (CRP), wheat bran (WB), rice husk (RH), defatted bran (DB) and soybean hulls (SH)  
76 were mixed with soybean molasses at a ratio of 100:30 (DM basis), dried at 65°C for 24 h, ground  
77 through a 1-mm sieve and stored in an airtight bag until further assays(Offered by Fengyi (Shanghai)  
78 biotechnology research and development center co. LTD. Shanghai, 200137, China). The chemical  
79 compositions of the five soybean molasses-adsorbents are listed in Table 1.

#### 80 1.1.2 *In vitro* gas production and sampling

81 The *in vitro* study was designed as a single factor randomized block design to evaluate the effects of  
82 five molasses-adsorbents. *In vitro* batch culture solutions were prepared using macroelement solution,  
83 buffer and reducing agent. The buffer was prepared as described by [Tang et al. \(2006\)](#) and it was kept

84 anaerobic by continuously pumping carbon dioxide for 2 h. Rumen fluid was obtained from three  
85 rumen-cannulated Holstein dairy cows fed *ad libitum* a mixed diet of rice straw and concentrate (60:40,  
86 wt/wt). The diets were offered twice daily at 0500 and 1600 h. Rumen contents of each dairy cow were  
87 obtained from various locations within the rumen immediately before the morning feeding, mixed and  
88 strained through four layers of cheesecloth under a continuous CO<sub>2</sub> stream. The obtained rumen fluid  
89 was then anaerobically combined with *In vitro* batch culture solutions in the proportion of 1 to 9 at  
90 39°C.

91 A 1000 ± 3 mg sample of each substrate was accurately weighed into a 100 mL fermentation bottle  
92 (Wanhong Glass Instrument Factory, China) pre-warmed at 39°C, then 50 ml of the mixed fluids  
93 (rumen fluids:artificial saliva = 1:9, V/V) were dispensed into each bottle. Each sample was replicated  
94 three times at each incubation time point. Bottles containing only mixed fluids were incubated as  
95 blanks together with the bottles containing different molasses-adsorbents. All fermentation bottles were  
96 connected with pressure sensors (CYG130-12, SQ sensor, China) and incubated at 39°C. The pressure  
97 in all the bottles was recorded at 0, 1, 2, 4, 6, 12, 24, and 48 h during the process of *in vitro*  
98 fermentation. Three bottles for each treatment were removed from the incubator to stop the incubation  
99 and the pH of the fluid in each bottle was determined immediately. The undegraded residues were  
100 filtered through 2 layers of nylon cloth (40-µm pore size). The incubation fluid was sampled at 12, 24  
101 and 48 h for determination of NH<sub>3</sub>-N and VFA concentrations.

## 102 1.2 In vivo experiment

### 103 1.2.1 Experimental diets and design

104 A randomized complete block design was with 24 multiparous Holstein cows (534 ± 58 kg BW, 2.8 ±  
105 0.7 parity) blocked into 8 blocks to ensure equal numbers of early-lactation (0-100 d) and mid-lactation

106 (100-200 d) cows for each treatment. One cow per group was randomly assigned to one of three  
107 treatments: Control (basal diet); WB (WB adsorbed to soybean molasses replaced 150 g of corn meal  
108 per 1000 g of diet dry matter [DM]) or SH (SH adsorbed to soybean molasses replaced 100 g of wheat  
109 bran and 50 g corn meal per 1000 g of diet DM). The three experimental diets were formulated to meet  
110 the nutrient requirements of lactating cows according to NRC (2001), and the treatments were chosen  
111 based on the *in vitro* fermentation results (Table 2).

112 The experiment lasted 5 weeks. Throughout the trial, cows were housed in a tie-stall facility. Diets  
113 were offered ad libitum twice daily at 0500 and 1600 h, and had free access to clean water. Before  
114 starting the experiment, all cows were fed the same diets for 2-wk.

### 115 1.3 Sample collection and handling

116 The experimental diets were offered twice daily, theorts were collected and recorded once daily.  
117 Weekly composites of the concentrates, rice straw, orsts, **DGS** (distillers grains with solubles) and beet  
118 pulp were obtained from daily samples of about 0.5 kg and stored at -20°C until analysis. Cows were  
119 milked twice daily, and individual milk yield was recorded at each milking during  
120 5-weeks-experiment. Milk samples were collected at 2 consecutive (p.m. and a.m.) milkings midway  
121 through wk 5 of the experimental phase for conventional analysis. Concentrations and yields of fat,  
122 protein, lactose, total solids (**TS**) and solids-not-fat (**SNF**) were computed as the weighted means from  
123 p.m. and a.m. milk yields on each test day. Blood samples were collected on the last day of wk 5 at  
124 0500, 0700 and 1100 h, respectively. Ten mL of blood samples were collected every point-in-time from  
125 the coccygeal vein into Vacutainer tubes which included anticoagulation (heparin sodium). After  
126 sampling, tubes were kept on ice and immediately transported to the laboratory for centrifugation at  
127 4000 × g for 10 min at 4°C, and plasma was stored at -80°C until assayed.

128 1.4 Chemical analyses

129 The DM and CP of *in vitro* fermentation substrates, concentrates, forage, orts, DGS and beet pulp were  
130 analyzed using the procedures of the Association of Official Analytical Chemists (AOAC, 2002). The  
131 NDF and ADF contents of the samples were determined using a Fibretherm Fiber Analyzer (Gerhardt,  
132 Bonn, Germany) according to Van Soest et al. (1991) with addition of sodium sulphite and  
133 alpha-amylase in the NDF analysis. The filtered residues were dried at 105°C for 12 h and weighed for  
134 *in vitro* DM disappearance (IVDMD) determination. The NDF contents of the dried residues were  
135 determined to calculate *in vitro* NDF (IVNDFD). Total gross energy (TE) content was determined by  
136 an isothermal automatic calorimeter (5E-AC8018, Changsha Kaiyuan Instruments Co., Ltd, China)  
137 The NH<sub>3</sub>-N and VFA concentration was determined according to Chen et al (2017),  
138 Milk samples were analyzed for fat, protein, lactose, SNF and TS by infrared methods (Foss  
139 North America, Eden Prairie, MN; Ag-Source, Verona, WI). Glutamic-pyruvic transaminase (GP  
140 T), plasma ammonia (AMM), amylase (AMY), cholesterol (CHO), glucose (GLU), lactate dehydrogenase (LDH), triglyceride (TG), total protein (TP), and urea nitrogen (UN) were analyzed  
141 by kits (Beijing Leadman Biochemical Co., Ltd, Beijing, China) using auto-biochemical analyzer (Beckman CX4, Beckman Coulter, Inc. USA).

144 *Calculation and Statistical Analysis*

145 During the initial stages of the *in vitro* experiment, the correlation between the pressure in fermentation  
146 bottles and gas volumes was measured at 39°C, and the regression equation was then established:

147 
$$y = 1.506x \quad (n = 20, R^2 = 0.999, P < 0.0001) \quad (1)$$

148 Where *y* represents gas volume (ml), *x* is the pressure in bottle (kPa), and 1.506 is a constant. The  
149 measured pressure was then converted to gas production (ml). *In vitro* gas production (GP) at 0, 1, 2, 4,

150 6, 12, 24, and 48 h were fitted to a logistic-exponential equation (Wang et al. 2011):

$$151 \quad GP = V_f * (1 - \exp(d - t * k)) / (1 + \exp(b - k * t)) \quad (2)$$

152 Where  $GP$  represents gas production at  $t$  time,  $V_f$  is the maximum gas production (ml),  $k$  represents gas  
153 production fraction (/h),  $b$  and  $d$  represent the shape of the gas production curve. The time ( $t_{0.5}$ , h) when  
154 half of the maximum gas production was achieved and the initial fractional rate of degradation ( $FRD_0$ ,  
155 /h) were respectively calculated by employing the following two equations (Wang et al. 2011; Wang et  
156 al. 2013):

$$157 \quad T_{0.5} = \ln(\exp(b) + 2\exp(d)) / k \quad (3)$$

$$158 \quad FRD_0 = k / (1 + \exp(b)) \quad (4)$$

159 The GP, IVDMD and IVNDFD were corrected by subtracting the values obtained for the blanks. Data  
160 were analyzed by two-way ANOVA using the MIXED procedure of SAS (2001), and the incubation  
161 time was treat as a repeated factor. Results of milk production, milk quality and blood parameters were  
162 statistically analyzed using ANOVA and the MIXED procedure of SAS (2001). Duncan's multiple  
163 range tests were used to compare differences among the three treatments. A P-value < 0.05 indicated  
164 statistical significance.

## 165 **2 Results**

### 166 *2.1 In vitro experiment*

#### 167 2.1.1 In vitro gas production characteristics of different molasses-adsorbents

168 The maximum gas production ( $V_f$ ) and  $t_{0.5}$  of SH were both greater ( $P < 0.01$ ) than that of CRP, WB,  
169 RH and DB, while no significant differences ( $P > 0.05$ ) were observed among the other four  
170 molasses-adsorbents (Table 3). However, the  $FRD_0$  (0.022 mL·h<sup>-1</sup>) of SH was the least among all  
171 molasses-adsorbents, and it was less than that of WB, RH and DB.



172 2.1.2 IVDMD, and IVNDFD of different molasses-adsorbents

173 Differences ( $P < 0.0001$ ) in IVDMD among the five molasses-adsorbents were observed (Table 3),  
174 with the IVDMD observed for WB (69.82%) being 27.3, 34.5, 3.0 and 17.3% greater than that of CRP,  
175 RH, DB, and SH, respectively. The IVNDFD of WB and SH were greater ( $P < 0.0001$ ) than that of  
176 other three molasses-adsorbents, with the lowest IVNDFD observed for RH (4.32%).

177 2.1.3 pH and NH<sub>3</sub>-N concentration of *in vitro* incubation fluids for different molasses-adsorbents

178 The range of pH values of the *in vitro* fermentation fluids was 5.89 to 6.75. The lowest pH value  
179 was for WB, with it being less ( $P < 0.0001$ ) than that of the other four molasses-adsorbents (Table 4).  
180 The greatest NH<sub>3</sub>-N concentration (35.2 mg/dL) was obtained for WB, with it being greater ( $P <$   
181  $0.0001$ ) than that of the other four molasses-adsorbents.

182 2.1.4 VFA content of *in vitro* incubation fluids for different molasses-adsorbents

183 Acetate content of SH was greater ( $P < 0.0001$ ) than that of the other four molasses-adsorbents  
184 (Table 4). The propionate content of SH was the greatest among the five molasses-adsorbents, with it  
185 being greater than ( $P < 0.01$ ) that of CRP and RH. Butyrate content of WB was 56.1, 28.7, 18.8 and  
186 20.7% greater ( $P < 0.0001$ ) than that of CRP, RH, DB and SH, respectively. The SH and WB also had  
187 the greatest content of TVFA ( $P < 0.0001$ ). There were no differences in A:P ( $P > 0.05$ ) for all five  
188 molasses-adsorbents.

189 2.2 *In vivo* experiment

190 2.2.1 Milk performance

191 The milk yield was 25.0 and 17.0 kg during early- and mid-lactation, respectively, and there were no  
192 differences ( $P > 0.05$ ) among the three treatments for either lactation period (Table 5). The contents  
193 of lactose and SNF were not affected ( $P > 0.05$ ) by the replacement of molasses-adsorbents. The

194 milk fat and total solids contents of cows fed the WB treatment were greater ( $P < 0.01$ ) than those fed  
195 control and SH treatments in early lactation, while there were no treatment differences ( $P > 0.05$ ) in  
196 mid-lactation. The milk protein content of cows fed the CG treatment decreased by 0.34%, 0.20% and  
197 0.17%, 0.16% ( $P < 0.01$ ) compared with that of WB and SH treatments in early- and mid-lactation  
198 periods, respectively.

### 199 2.2.2 Blood biochemistry indexes

200 The plasma GPT concentration of control was less ( $P < 0.01$ ) than that of WB and SH treatments in  
201 early- and mid-lactation periods, while there was no differences ( $P > 0.05$ ) between WB and SH  
202 treatments (Table 6). Plasma TP concentration of control was greater ( $P < 0.01$ ) than that of WB and  
203 SH treatments in mid-lactation period. The AMY concentration of WB treatment was 96.64% and  
204 32.50% greater ( $P < 0.01$ ) than that of control in early- and mid-lactation periods, respectively, while  
205 there was no difference ( $P > 0.05$ ) in AMY concentration between WB and SH treatments. The  
206 plasma LDH concentration of WB treatment was 20.87% greater ( $P < 0.01$ ) than that of CG treatments  
207 in the mid-lactation period. No differences ( $P > 0.05$ ) in plasma AMM, CHO, GLU, TG and UN  
208 concentration were found among three treatments in both early- and mid-lactation periods.

## 209 **3 Discussion**

### 210 *3.1 In vitro gas production characteristics of different molasses-adsorbents*

211 *In vitro* maximum gas production is an important parameter to evaluate rumen fermentation in  
212 ruminants because it provides valuable information about the kinetics of feed digestion in the rumen  
213 and reflects the utilization efficiency of fermentation substrates (Metzler-Zebeli et al., 2012). Khazaal  
214 et al. (1993) reported that maximum gas production was positively related to hemicellulose and crude  
215 protein (CP) contents, while other studies observed a negative relationship between gas production and

216 CP content of fermentation substrates *in vitro* (Cone and van Gelder, 1999; Tolera and Sundstol, 1999).  
217 The current results showed that  $V_f$  of SH was greater than that of other the four soybean  
218 molasses-adsorbents, due to their differing chemical composition, especially the ratio of non-structural  
219 carbohydrate to CP which plays an important role in *in vitro* gas production (Tang et al., 2006).  
220 Indexes of  $FRD_0$  and  $t_{0.5}$  usually reflect the rate of degradation at an early incubation stage of < 12 h  
221 and the incubation time of reaching half of the maximum gas production, respectively. Generally  
222 speaking, the faster  $FRD_0$  is, the shorter  $t_{0.5}$  becomes (Wang et al., 2013). In the present study,  $FRD_0$  of  
223 SH was the least while  $t_{0.5}$  of SH was greatest. These variations of  $FRD_0$  and  $t_{0.5}$  should be ascribed to  
224 differences of nutrients content among the five soybean molasses-adsorbents.

### 225 3.2 IVDMD, and IVNDFD of different molasses-adsorbents

226 *In vitro* DM disappearance can reflect the extent of fermentation of substrates by ruminal  
227 microorganisms. Our results showed that IVDMD and IVNDFD of WB were the greatest among the  
228 five soybean molasses-adsorbents. It has been shown that dietary molasses supplementation can  
229 improve nutrient digestibility in lactating cows, particularly for fiber (Broderick and Radloff, 2004).  
230 Usually, dietary sugars undergo rapid fermentation in the rumen of dairy cows, theoretically leading to  
231 lactic acid production and decline of ruminal pH, which potentially depresses fiber digestibility (Oelker  
232 et al., 2009). However, Broderick and Radloff (2004) reported that replacing high-moisture corn with  
233 molasses improved fiber digestibility, likely reflecting a stimulatory effect of molasses on  
234 fiber-digesting ruminal bacteria. In the present study, although the adsorbed concentration of soybean  
235 molasses was the same, the chemical composition of the molasses-adsorbents differed due to the  
236 substrate itself and possibly due to interaction between soybean molasses and the substrate. The rumen  
237 is a very complex ecosystem in which numerous microorganisms and factors play an important role in

238 nutrient degradation. Further study is thereby needed to investigate the mechanism of soybean molasses  
239 supplementation on the activity of ruminal amylolytic, proteolytic and cellulolytic bacteria during the  
240 processes of *in vitro* fermentation.

### 241 3.3 *In vitro* fermentation parameters of different molasses-adsorbents

242 As pH value is an important index reflecting the internal homeostasis of the rumen environment,  
243 maintaining a relatively stable ruminal pH is vital to assuring efficient rumen fermentation.  
244 Ruminants usually possess highly developed systems to maintain ruminal pH value within a  
245 physiological range of about 5.5-7.0 (Krause and Oetzel 2006). In the present study, the pH of *in vitro*  
246 incubation fluids ranged from 5.89 to 6.75 for the five soybean molasses-adsorbents. Thus, the highly  
247 buffered system maintained suitable conditions for fermentation, microbial growth, and fiber  
248 degradation in the rumen (Stewart et al., 1997). Sari et al. (2015) reported that low ruminal pH  
249 decreased NH<sub>3</sub>-N concentration and increased non-ammonia N flow compared with high ruminal pH in  
250 beef cattle fed diets containing barley straw or non-forage fiber sources. Khalili (1993) found that  
251 molasses supplementation linearly decreased the mean value of rumen pH from 6.6 to 6.2 with the  
252 increasing levels of molasses fed to crossbred non-lactating cows. However, in our study there was no  
253 consistency between NH<sub>3</sub>-N concentration and pH in *in vitro* fermentation fluids, likely because the  
254 batch culture system was highly buffered. The inconsistency between *in vivo* and *in vitro* results may  
255 relate to the buffering capacity of the two systems.

256 Simultaneously, ruminal NH<sub>3</sub>-N concentration reflects the equilibrium state for CP degradation and  
257 synthesis under specific dietary conditions. As an important nitrogen source for microbial growth and  
258 protein synthesis, ruminal NH<sub>3</sub>-N has a low efficiency for milk protein synthesis partially due to  
259 NH<sub>3</sub>-N losses in the rumen (Tamminga, 1992; Hristov and Ropp, 2003). Satter and Slyter (1974)

260 suggested that the NH<sub>3</sub>-N concentration of rumen fluid should not be less than 5 mg/dL to maintain a  
261 high growth rate of bacteria. Deficiency of NH<sub>3</sub>-N restricts microbial protein synthesis, while high  
262 NH<sub>3</sub>-N concentration inhibits the microbial NH<sub>3</sub>-N utilization in the rumen (Hristov et al., 2002). In our  
263 study, the NH<sub>3</sub>-N concentrations in *in vitro* fermentation fluids for all five molasses-adsorbents  
264 exceeded 5 mg/dL, indicating that the molasses-adsorbents did not restrict ruminal bacterial growth and  
265 microbial protein synthesis during the fermentation processes. Meanwhile, feeding a sugar-based  
266 product within a diet can change ruminal fermentation pattern, and then further change ruminal NH<sub>3</sub>-N  
267 concentration (Broderick and Radloff, 2004; DeFrain et al., 2006). In the present study, the different  
268 CP contents of the five molasses-adsorbents probably caused the differences of NH<sub>3</sub>-N concentration in  
269 *in vitro* fermentation fluids. In a number of studies, researchers have also observed strong correlation  
270 between dietary CP content and NH<sub>3</sub>-N concentration (Broderick and Clayton, 1997). Additionally, the  
271 difference in amount and activity of the protein-decomposing microbes for the five substrates might  
272 have led to the difference in NH<sub>3</sub>-N concentration. Many studies have demonstrated that  
273 protein-decomposing microbes (e.g., *Prevotella sp.*) play an important role in the degradation of CP to  
274 NH<sub>3</sub>-N (Jouany, 1996; Wallace, 1996).

#### 275 3.4 *In vitro* VFA content of different molasses-adsorbents

276 Ruminal volatile fatty acids (VFAs) are major energy sources for ruminants and differences in the total  
277 and proportions of individual VFA are important physiological indices that reflect rumen digestion and  
278 metabolism. Ruminal microorganisms can transform carbohydrates (e.g. fiber, starch and soluble sugar)  
279 to pyruvic acid, which can be further transferred into different VFAs by metabolic pathways. Several  
280 studies have confirmed that molasses addition can reduce the ruminal acetate concentration but  
281 increase the ruminal butyrate and propionate concentration *in vitro* and *in vivo* (Hristov and Ropp, 2003;

282 [DeFrain et al., 2006](#); [Ferraro et al. 2009](#)). However, [Martel et al. \(2011\)](#) reported that dietary molasses  
283 supplementation increased the molar proportions of acetate and butyrate, but decreased the proportions  
284 of propionate and total VFA (TVFA) in the rumen of dairy cows. [Broderick and Radloff \(2004\)](#)  
285 proposed that increased sugar intake (as dried molasses) does not alter the ruminal concentration of  
286 total VFA, acetate, butyrate, or any other individual VFA. In the present study, the concentration of  
287 acetate, propionate, butyrate and TVFA of *in vitro* incubation fluids were significantly different for the  
288 five soybean molasses-adsorbents, and the largest value of TVFA was obtained for SH, implying that  
289 SH may provide more energy for ruminants. Moreover, the variations in VFA concentration might be  
290 associated with the differences in ruminal OM digestibility of five molasses-adsorbents ([Calsamiglia et](#)  
291 [al., 2008](#)). Comprehensively considering the *in vitro* fermentation characteristics of the five  
292 molasses-adsorbents, especially *in vitro* disappearance of NDF and VFA concentration, two  
293 molasses-adsorbents (i.e., wheat bran-molasses, WB; soybean hull-molasses, SH) were selected for  
294 further in vivo experiment.

### 295 *3.5 Milk performance*

296 Dietary sugar supplementation can be beneficial for stimulating ruminal microbial protein formation  
297 from rumen degradable protein; thus, yield of milk and particularly milk protein content can be easily  
298 affected by sugar feeding ([Broderick and Radloff, 2004](#)). In the present study, differences in milk  
299 production were not observed in early- and mid-lactation, while the milk fat content in early-lactation  
300 was improved when dietary corn (100 g/kg) and wheat bran (50 g/kg) were replaced with SH at 150  
301 g/kg of dietary DM, or dietary wheat bran was replaced with 150 g/kg of WB. This result is similar to  
302 the previous findings of [Martal et al. \(2011\)](#), who reported that dietary molasses supplementation  
303 increased milk fat concentration without significantly affecting milk yield when molasses replaced corn

304 at 50 g/kg dietary DM. However, Brito et al. (2014) reported that yields of milk and milk components  
305 can be decreased in lactating cows fed flaxseed meal-based diets supplemented with molasses (liquid  
306 molasses plus flaxseed meal vs corn meal plus flaxseed meal). This difference might result from the  
307 different molasses sources and dietary composition.  
308 Yan et al. (1997) demonstrated that when molasses inclusion in the diets fed to mid-lactation cows  
309 increased from 156 to 468 g/kg DM, milk protein concentration increased from 31.6 to 33.6 g/kg.  
310 Keady and Murphy (1998) observed that supplementing sucrose (10 g/kg DM) significantly increased  
311 milk protein concentration of lactating dairy cows. The above-mentioned findings support our results  
312 that milk protein content was both significantly increased when WB replaced corn at 150 g/kg DM and  
313 SH replaced corn at 50 g/kg DM and wheat bran at 100 g/kg DM in early- and mid-lactation periods.  
314 Furthermore, Murphy (1999) concluded that milk protein yield can increase when dairy cows are fed  
315 rumen-fermentable energy in the form of molasses in a grass silage-based diet. It was suggested that  
316 ruminal microbial protein synthesis can be stimulated and a greater proportion of degradable N can be  
317 captured by rumen microbes for dairy cows, leading to increased milk protein synthesis. Therefore, the  
318 increment of milk protein content in early- and mid-lactation periods is consistent with the previous  
319 literature (Broderick et al., 2004).

### 320 3.6 Blood metabolites

321 The greater plasma GPT concentration observed when SH replaced corn at 150 g/kg DM and WB  
322 replaced corn at 50 g/kg DM and wheat bran at 100 g/kg DM in the diet fed to cows in early- and  
323 mid-lactation might be due to more production of alcohol in the rumen for SH and WB treatments.  
324 Generally, *Saccharomyces cerevisiae* populations in the rumen increase when molasses is added to  
325 dairy rations, and more alcohol may have been produced by *Saccharomyces cerevisiae* during

326 fermentation of SH and WB treatments. Once in the liver, alcohol causes a rise in plasma GPT  
327 concentration (Li et al., 2012; Han et al., 2017).

328 Dairy cows with high genetic merit require an energy-dense diet to fulfill their production potential,  
329 and thus starchy cereals are prevalent in the diets of high-producing dairy cows (Nozière et al., 2014).

330 In the present study, the greater plasma AMY concentration of WB treatment in early- and  
331 mid-lactation compared with that of the control treatment probably resulted from molasses being  
332 fermented rapidly in the rumen supplying energy to the ruminal microbes leading to a more efficient  
333 utilization of starch.

334 Some studies have shown that LDH can be affected many factors in dairy cows (Chagunda et al., 2006;  
335 Piccinini et al., 2007; Wenz et al., 2010). Nyman et al. (2014) confirmed the hypothesis that LDH can  
336 indicate inflammation. In the present study, plasma LDH concentration for WB treatment was greater  
337 than that of control treatment in mid-lactation. These probably because of the higher formation of lactic  
338 acid and lower rumen pH, it resulted in rumen acidosis and caused inflammation.

339 Lesmeister and Heinrichs (2005) reported no significant differences in blood TP concentration between  
340 calves receiving starters containing molasses at 50 and 120 g/kg DM. Azizi-Shotorkhoft et al. (2013)  
341 also found no significant difference in blood TP concentration for Moghani sheep fed different levels  
342 of molasses (0-100 g/kg). In the current study, the significant changes in plasma TP concentration  
343 observed among treatments in mid-lactation, the reasons probably ascribable to the difference in  
344 ingredients of experiment diets among treatments. No significant change were observed in  
345 early-lactation likely due to the relatively small DMI and a short feeding of the dairy cows during the  
346 early lactation period, and the significant differences among treatments during mid-lactation period  
347 would be probably resulted from the accumulative effect for a longer feeding.



348 [Thomas et al. \(1988\)](#) proposed that plasma UN concentration reflects dietary protein intake. Rusche et  
349 al. (1993) reported that feeding sources of CP that are less degradable in the rumen decreases blood UN  
350 concentration. The lack of significant difference in plasma UN concentration in the present study was  
351 in agreement with the findings of [Hatfield et al. \(1998\)](#), who found that molasses type had no effect on  
352 plasma UN in sheep.

#### 353 **4 Conclusion**

354 Two molasses-adsorbents (soybean molasses adsorbed by wheat bran and soybean hulls) improved  
355 maximum gas production, ruminal total VFA content and NDF degradation *in vitro*. Replacement of  
356 dietary corn meal/wheat bran by soybean molasses-adsorbents in the diet of dairy cows increased milk  
357 protein and fat contents. We conclude dietary corn meal/wheat bran replacement by soybean  
358 molasses-adsorbents promotes ruminal fermentation and improves milk quality in lactating dairy cows.

#### 359 **Acknowledgements**

360 The authors thank Professor Beauchemin Karen for revising the manuscript. This work were supported  
361 by the National Natural Science Foundation of China (No.31372342, 3177131431), Youth Innovation  
362 Team Project of ISA, Chinese Academy of Sciences (2017QNCXTD\_ZCS) and Hunan Provincial  
363 Science and Technology Department (2017JJ1028, 2017NH1020).

364

365

366

367

368

369

370

371

372

373

374

375

376

377

378

379

380

381

382 **References**

383 AOAC 2002 Association of Official Analytical Chemists: Official Methods of Analysis, 16th Edition.,

384 Washington, D.C.

385 Azizi-Shotorkhoft, A., Rezaei, J. & Fazaeli, H. (2013). The effect of different levels of molasses on the

386 digestibility, rumen parameters and blood metabolites in sheep fed processed broiler litter. *Animal*.

387 *Feed Science Technology*, 179, 69-76.

388 Brito, A. F., Petit, H. V., Pereira, A. B. D., Soder, K. J. & Ross, S. (2014). Interactions of corn meal or

389 molasses with a soybean-sunflower meal mix or flaxseed meal on production, milk fatty acid

390 composition, and nutrient utilization in dairy cows fed grass hay-based diets. *Journal of Dairy*

391 *Science*, 98, 443-457.

392 Broderick, G. A. & Clayton, M. K. (1997). A statistical evaluation of animal and nutritional factors

393 influencing concentrations of milk urea nitrogen. *Journal of Dairy Science* 80 2964-2971.

394 Broderick, G. A., & Radloff, W. J. (2004). Effect of molasses supplementation on the production of

395 lactating dairy cows fed diets based on alfalfa and corn silage. *Journal of Dairy Science*, 87,

396 2997-3009.

- 397 Broderick, G. A., Luchini, N. D., Reynal, S. M., Varga, G. A. & Ishler, V. A. (2008). Effect on  
398 production of replacing dietary starch with sucrose in lactating dairy cows. *Journal of Dairy*  
399 *Science*, 91, 4801-4810.
- 400 Calsamiglia, S., Cardozo, P. W., Ferret, A. & Bach, A. (2008). Changes in rumen microbial  
401 fermentation are due to a combined effect of type of diet and pH. *Journal of Animal Science*, 86,  
402 702-711.
- 403 Chen, L., Ren, A., Zhou, C. S., & Tan, Z. L. (2017). Effects of *Lactobacillus acidophilus*  
404 supplementation for improving in vitro rumen fermentation characteristics of cereal straws. *Italian*  
405 *Journal of Animal Science*, 16, 52-60.
- 406 Cone, J. W., & van, Gelder A. H. (1999). Influence of protein fermentation on gas production profiles.  
407 *Animal Feed Science and Technology*, 76, 251-264.
- 408 DeFrain, J. M., Hippen, A. R., Kalscheur, F., & Schingoethe, D. J. (2006). Feeding lactose to increase  
409 ruminal butyrate and the metabolic status of transition dairy cows. *Journal of Dairy Science*, 89,  
410 267-276.
- 411 Ferraro, S. M., Mendoz, G. D., Miranda, L. A. & Gutiérrez, C. G. (2009). In vitro gas production and  
412 ruminal fermentation of glycerol, propylene glycol and molasses. *Animal Feed Science and*  
413 *Technology*, 154, 112-118.
- 414 Firkins, J. L., Oldick, B. S., Pantoja, J., Reveneau, C. L., Gilligan, E. & Carver, L. (2008). Efficacy of  
415 liquid feeds varying in concentration and composition of fat, nonprotein nitrogen, and nonfiber  
416 carbohydrates for lactating dairy cows. *Journal of Dairy Science*, 91, 1969-1984.
- 417 Hatfield, P. G., Hopkins, J. A., Ramsey, W. S. & Gilmore, A. (1998). Effects of level of protein and  
418 type of molasses on digesta kinetics and blood metabolites in sheep. *Small Ruminant Research*, 28,  
419 161-170.

- 420 Han, D., Johnson, H. S., Rao, M. P., Martin, G., Sancheti, H., Silkwood, K. H., Decker, C. W., Nguyen,  
421 K. T., Casian, J. G., Cadenas, E. & Kaplowitz, N. (2017). Mitochondrial remodeling in the liver  
422 following chronic alcohol feeding to rats. *Free Radical Biology and Medicine*, 102, 100-110.
- 423 Hristov, A. N. & Ropp, J. K. (2003). Effect of dietary carbohydrate composition and availability on  
424 utilization of ruminal ammonia nitrogen for mild protein synthesis in dairy cows. *Journal of*  
425 *Dairy Science*, 86, 2416-2427.
- 426 Hristov, A. N., Ropp, J. K., & Hunt, C.W. (2002). Effect of barley and its amylopectin content on  
427 ruminal fermentation and bacterial utilization of ammonia-N in vitro. *Animal Feed Science and*  
428 *Technology*, 99, 25-36.
- 429 Jouany, J. P. (1996). Effect of rumen protozoa on nitrogen utilization by ruminants. *Journal of*  
430 *Nutrition*, 126, 1335-1346.
- 431 Keady, T. W. J. & Murphy, J. J. (1998). The effects of ensiling and supplementation with sucrose and  
432 fishmeal in forage intake and milk production of lactating dairy cows. *Animal Science*, 66, 9-20.
- 433 Khalili, H. (1993). Supplementation of grass hay with molasses in crossbred (Bostaurus×Bosindicus)  
434 non-lactating cows: effect of level of molasses on feed intake, digestion, rumen fermentation and  
435 rumen digesta pool size. *Animal Feed Science and Technology*, 41, 23-38.
- 436 Khazaal, K., Markantonatos, X., Nastis, A. & Ørskov, E. R. (1993). Changes with maturity in fiber  
437 composition and levels of extractable polyphenols in Greek browse: effects on in vitro gas  
438 production and in sacco dry matter degradation. *Journal of the Science of Food and Agriculture*,  
439 63, 237-244.
- 440 Krause, K. M. & Oetzel, G. R. (2006). Understanding and preventing subacute ruminal acidosis in  
441 dairy herds: A review. *Animal Feed Science and Technology*, 126, 215-236.

- 442 Lesmeister, K. E. & Heinrichs, A. J. (2005). Effects of adding extra molasses to a texturized calf starter  
443 on rumen development, growth characteristics, and blood parameters in neonatal dairy calves.  
444 *Journal of Dairy Science*, 88, 411-418.
- 445 Li, X. Z., Park, B. K., Yan, C. G., Choi, J. G., Ahn, J. S. & Shin, J. S. (2012). Effect of alcohol  
446 fermented feed on lactating performance, blood metabolites, milk fatty acid profile and cholesterol  
447 content in Holstein lactating cows. *Asian-Australasian Journal of Animal Science*, 25, 1546-1552.
- 448 Martel, C. A., Titgemeyer, E. C., Mamedova, L. K. & Bradford, B. J. (2011). Dietary molasses increase  
449 ruminal pH and enhances ruminal biohydrogenation during milk fat depression. *Journal of Dairy  
450 Science*, 94, 3995-4004.
- 451 Metzler-Zebeli, B. U., Scherr, C., Sallaku, E., Drochner, W. & Zebeli, Q., (2012). Evaluation of  
452 associative effects of total mixed ration for dairy cattle using in vitro gas production and different  
453 rumen inocula. *Journal of the Science of Food and Agriculture*, 92, 2479-2485.
- 454 Murphy, J. J. (1999). The effects of increasing the proportion of molasses in the diet of milking dairy  
455 cows on milk production and composition. *Animal Feed Science and Technology*, 78, 189-198.
- 456 Murphy, M. R., Geijssels, A. W. P., Hall, E. C. & Shanks, R. D. (1997). Dietary variety via sweetening  
457 and voluntary feed intake of lactating dairy cows. *Journal of Dairy Science*, 80, 894-897.
- 458 Nozière, P., Steinberg, W., Silberberg, M. & Morgavi, D. P. (2014). Amylase addition increases starch  
459 ruminal digestion in first-lactation cows fed high and low starch diets. *Journal of Dairy Science*,  
460 97, 2319-2328.
- 461 National Research Council (U.S.). Subcommittee on Dairy Cattle Nutrition. Nutrient requirements of  
462 dairy cattle [M]. Washington, D.C.: National Academies Press, 2001.

- 463 Nyman, A. K., Waller, K. P., Bennedsgaard, T. W., Larsen, T. & Emanuelson, U. (2014). Associations  
464 of udder-health indicators with cow factors and with intramammary infection in dairy cows.  
465 *Journal of Dairy Science*, 97, 5459-5473.
- 466 Oelker, E. R., Reveneau, C. & Firkins, J. L. (2009) Interaction of molasses and monensin in alfalfa  
467 hay- or corn silage-based diets on rumen fermentation, total tract digestibility, and milk  
468 production by Holstein cows. *Journal of Dairy Science*, 92, 270-285.
- 469 Piccinini, R., Binda, E., Belotti, M., Dapra, V. & Zecconi, A. (2007). Evaluation of milk components  
470 during whole lactation in healthy quarters. *Journal of Dairy Science*, 74, 226-232.
- 471 Rusche, W. C., Cochran, R. C., Corah, L. R., Stevenson, J. S., Harmon, D. L., Brandt, R. T. & Minton,  
472 J. E. (1993). Influence of source and amount of dietary protein on performance, blood metabolites,  
473 and reproductive function of primiparous beef cows. *Journal of Animal Science*, 71, 557-563.
- 474 Sari, M., Ferret, A. & Calsamiglia, S. (2015). Effect of pH on *in vitro* microbial fermentation and  
475 nutrient flow in diets containing barley straw or non-forage fiber sources. *Animal Feed Science*  
476 *and Technology*, 200, 17-24.
- 477 Satter, L. D., & Slyter, L. L. (1974). Effect of ammonia concentration of rumen microbial protein  
478 production in vitro. *British Journal of Nutrition*, 32, 199-208.
- 479 Shi, Y., Kong, X. Z., Zhang, C. M., Chen, Y. M. & Hua, Y. F. (2013). Adsorption of soy isoflavones by  
480 activated carbon: Kinetics, thermodynamics and influence of soy oligosaccharides. *Chemical*  
481 *Engineering Journal*, 215-216, 113-121.
- 482 Stewart, C. S., Flint, H. J. & Bryant, M. P. (1997). The rumen bacteria, in: Hobson, P.N. and C. S.  
483 Stewart. (Eds.). *The Rumen Microbial Ecosystem*. Chapman and Hall, London, UK, pp. 10-72.

- 484 Tamminga, S. (1992). Nutrition management of dairy cows as a contribution to pollution control.  
485 *Journal of Dairy Science*, 75, 345-357.
- 486 Tang, S. X., Tan, Z. L., Zhou, C. S., Jiang, H. L., Jiang, Y. M. & Sheng, L. X. (2006). A comparison of  
487 *in vitro* fermentation characteristics of different botanical fractions of mature maize stover.  
488 *Journal of Animal and Feed Science*, 15, 505-515.
- 489 Thomas, V. M., McInerney, M. J. & Kott, R. W. (1988). Influence of body condition and lasolcid  
490 during late gestation on blood metabolites, lamb birth weight and colostrum composition and  
491 production in Finn-cross ewes. *Journal of Animal Science*, 66, 783-791.
- 492 Tolera, A. & Sundstøl, F. (1999). Morphological fractions of maize stover harvested at different stages  
493 of grain maturity and nutritive value of different fractions of the stover. *Animal Feed Science and*  
494 *Technology*, 81, 1-16.
- 495 Van Soest, P. J., Robertson, J. B. & Lewis, B. A. (1991). Methods for dietary fiber, neutral detergent  
496 fiber and non-starch polysaccharides in relation to animal nutrition. *Journal of Dairy Science*, 74,  
497 3583-3597.
- 498 Wallace, R. J. (1996) Ruminal microbial metabolism of peptides and amino acids. *Journal of Nutrition*,  
499 126, 1326-1334.
- 500 Wang, M., Sun, X. Z., Tang, S. X., Tan, Z. L. & Pecheco, D. (2013). Deriving fractional rate of  
501 degradation of logistic-exponential (LE) model to evaluate early *in vitro* fermentation. *Animal*, 7,  
502 920-929.
- 503 Wang, M., Tang, S. X. & Tan, Z. L. (2011). Modeling *in vitro* gas production kinetics: Derivation of  
504 Logistic-Exponential (LE) equations and comparison of models. *Animal Feed Science and*  
505 *Technology*, 165, 137-150.

- 506 Wenz, J. R., Fox, L. K., Muller, F. J., Rinaldi, M., Zeng, R. & Bannerman, D. D. (2010). Factors  
507 associated with concentrations of select cytokine and acute phase proteins in dairy cows with  
508 naturally occurring clinical mastitis. *Journal of Dairy Science*, 93, 2458-2470.
- 509 Yan, T., Roberts, D. J. & Higginbotten, J. (1997). The effects of feeding high concentration of  
510 molasses and supplementary with nitrogen and unprotected tallow on intake and performance of  
511 dairy cows. *Animal Science*, 64, 17-24.
- 512 Zhang, W. J., Li, S. L., Shi, H. T., Luo, Y. P., Yang, J. X., Yin, Y. J. & Jia, C. T. (2013). Different  
513 kinds of molasses: Effects on feed intake and milk performance of dairy cows during summer heat  
514 stress. *Chinese Journal of Animal Nutrition*, 25, 163-170.



515 **Table 1.** Chemical composition of five soybean molasses adsorbed substrates

| Items ‡     | Substrates † |       |       |       |       |
|-------------|--------------|-------|-------|-------|-------|
|             | CRP          | WB    | RH    | DB    | SH    |
| DM (%)      | 88.82        | 91.27 | 92.61 | 88.99 | 88.38 |
| N (%)       | 1.25         | 3.17  | 1.34  | 3.04  | 2.12  |
| TE (Mcal/g) | 17.91        | 18.17 | 16.70 | 16.64 | 17.34 |
| NDF (%)     | 56.47        | 29.87 | 54.61 | 23.68 | 52.85 |
| ADF (%)     | 35.30        | 9.94  | 45.44 | 9.44  | 39.59 |

516 † CRP = corncob powder-soybean molasses adsorbent; WB = wheat bran-soybean molasses adsorbent;

517 RH = rice husk-soybean molasses adsorbent; DB = defatted bran-soybean molasses adsorbent; SH =

518 soybean hulls-soybean molasses adsorbent.

519 ‡ DM = dry matter; N = nitrogen; TE = total energy; NDF = neutral detergent fiber; ADF = acid

520 detergent fiber.

521

**Table 2.** Ingredients and chemical composition of experimental diets

| Ingredient                                                | Group                |       |       |
|-----------------------------------------------------------|----------------------|-------|-------|
|                                                           | CG                   | SH †  | WB ‡  |
|                                                           | Feeding (kg/d • cow) |       |       |
| Rice straw                                                | 6.0                  | 6.0   | 6.0   |
| Beet pulp                                                 | 3.0                  | 3.0   | 3.0   |
| DGS <sup>§</sup>                                          | 3.0                  | 3.0   | 3.0   |
| Concentrate                                               | 4.0                  | 4.0   | 4.0   |
|                                                           | (% of DM)            |       |       |
| Corn meal                                                 | 43.1                 | 33.1  | 43.1  |
| Soybean meal                                              | 10.0                 | 10.0  | 10.0  |
| Wheat bran                                                | 18.0                 | 13.0  | 3.0   |
| DGS <sup>§</sup>                                          | 21.0                 | 21.0  | 21.0  |
| SH adsorbed molasses                                      | -                    | 15.0  | -     |
| WB adsorbed molasses                                      | -                    | -     | 15.0  |
| CaHPO <sub>4</sub>                                        | 1.5                  | 1.5   | 1.5   |
| CaCO <sub>3</sub>                                         | 1.3                  | 1.3   | 1.3   |
| NaHCO <sub>3</sub>                                        | 0.6                  | 0.6   | 0.6   |
| NaCl                                                      | 0.5                  | 0.5   | 0.5   |
| Premix <sup>¶</sup>                                       | 4.0                  | 4.0   | 4.0   |
| Chemical composition of concentrate (% of concentrate DM) |                      |       |       |
| Dry matter                                                | 93.98                | 94.11 | 94.63 |
| Crude protein                                             | 18.89                | 19.66 | 19.13 |
| Calcium                                                   | 1.90                 | 1.86  | 1.89  |
| Phosphorus                                                | 0.80                 | 0.77  | 0.79  |
| Neutral detergent fiber                                   | 18.70                | 17.22 | 18.03 |
| RDP, % of CP                                              | 59.81                | 60.14 | 59.29 |

522 † SH = soybean hulls-soybean molasses adsorbents.

523 ‡WB = wheat bran-soybean molasses adsorbents.

524 §DGS = distillers grains with solubles.

525 ¶ Premix ( /kg) : 113.85g MgSO<sub>4</sub>•H<sub>2</sub>O, 2.69 g FeSO<sub>4</sub>•7H<sub>2</sub>O, 2.55 g CuSO<sub>4</sub>•5H<sub>2</sub>O, 9.54 g

526  $\text{MnSO}_4 \cdot \text{H}_2\text{O}$ , 9.60 g  $\text{ZnSO}_4 \cdot \text{H}_2\text{O}$ , 30 mg  $\text{Na}_2\text{SeO}_3$ , 60 mg KI, 180 mg  $\text{CoCl}_2 \cdot 6\text{H}_2\text{O}$ , 500,000 IU

527 Vitamin A, 60 kIU Vitamin D, 2000 IU Vitamin E.

528 **Table 3.** Effects of different soybean molasses adsorbed substrates on *in vitro* gas production  
 529 parameters, IVDMD and IVNDFD

| Items <sup>§</sup>                                | Substrates <sup>†</sup> |                    |                    |                    |                    | SEM <sup>‡</sup> | <i>P</i> |
|---------------------------------------------------|-------------------------|--------------------|--------------------|--------------------|--------------------|------------------|----------|
|                                                   | CRP                     | WB                 | RH                 | DB                 | SH                 |                  |          |
| $V_f$ (mL)                                        | 169.7 <sup>b</sup>      | 189.1 <sup>b</sup> | 158.5 <sup>b</sup> | 171.2 <sup>b</sup> | 323.4 <sup>a</sup> | 27.01            | **       |
| $FRD_0$ (mL·h <sup>-1</sup> ) (10 <sup>-2</sup> ) | 3.89 <sup>b</sup>       | 6.42 <sup>a</sup>  | 6.59 <sup>a</sup>  | 6.79 <sup>a</sup>  | 2.20 <sup>b</sup>  | 0.790            | **       |
| $T_{0.5}$ (h)                                     | 16.71 <sup>b</sup>      | 10.95 <sup>b</sup> | 10.5 <sup>b</sup>  | 10.09 <sup>b</sup> | 31.37 <sup>a</sup> | 2.160            | ***      |
| IVDMD (%)                                         | 42.50 <sup>d</sup>      | 69.82 <sup>a</sup> | 35.36 <sup>c</sup> | 66.81 <sup>b</sup> | 52.56 <sup>c</sup> | 0.39             | ***      |
| IVNDFD (%)                                        | 17.41 <sup>c</sup>      | 34.42 <sup>a</sup> | 4.32 <sup>d</sup>  | 24.89 <sup>b</sup> | 33.71 <sup>a</sup> | 0.89             | ***      |

530 <sup>†</sup> CRP = corncob powder-soybean molasses adsorbent; WB = wheat bran-soybean molasses adsorbent,  
 531 RH = rice husk-soybean molasses adsorbent; DB = defat bran-soybean molasses adsorbent, SH =  
 532 soybean hulls-soybean molasses adsorbent.

533 <sup>‡</sup> SEM was standard error of means.

534 <sup>§</sup> IVDMD = in vitro DM disappearance; IVNDFD = in vitro NDF disappearance.

535 <sup>a, b, c, d</sup> Means within a row for different soybean molasses adsorbed fermentation substrates that do not  
 536 have a common superscript differ ( $P < 0.05$ ). \*  $P < 0.05$ ; \*\*  $P < 0.01$ ; \*\*\*  $P < 0.001$

537

538

539

540

541

542

543

544

545

546

547 **Table 4.** Effects of different soybean molasses adsorbed substrates on *in vitro* fermentation pH, NH<sub>3</sub>-N  
548 concentration, and VFAs concentration

| Items                      | Substrates <sup>†</sup> |                     |                     |                     |                    | SEM <sup>‡</sup> | P   |
|----------------------------|-------------------------|---------------------|---------------------|---------------------|--------------------|------------------|-----|
|                            | CRP                     | WB                  | RH                  | DB                  | SH                 |                  |     |
| pH                         | 6.34 <sup>b</sup>       | 5.89 <sup>d</sup>   | 6.75 <sup>a</sup>   | 6.01 <sup>c</sup>   | 6.00 <sup>c</sup>  | 0.03             | *** |
| NH <sub>3</sub> -N (mg/dL) | 5.09 <sup>d</sup>       | 35.18 <sup>a</sup>  | 15.91 <sup>b</sup>  | 12.95 <sup>c</sup>  | 12.68 <sup>c</sup> | 0.35             | *** |
| Acetate (mmol/L)           | 32.07 <sup>c</sup>      | 37.10 <sup>b</sup>  | 32.98 <sup>bc</sup> | 35.73 <sup>bc</sup> | 45.29 <sup>a</sup> | 1.59             | *** |
| Propionate (mmol/L)        | 19.44 <sup>b</sup>      | 25.41 <sup>a</sup>  | 19.83 <sup>b</sup>  | 24.81 <sup>a</sup>  | 27.08 <sup>a</sup> | 1.45             | **  |
| Butyrate (mmol/L)          | 4.14 <sup>c</sup>       | 9.42 <sup>a</sup>   | 6.72 <sup>b</sup>   | 7.65 <sup>b</sup>   | 7.47 <sup>b</sup>  | 0.53             | *** |
| TVFA (mmol/L) <sup>§</sup> | 56.65 <sup>c</sup>      | 75.99 <sup>ab</sup> | 61.24 <sup>c</sup>  | 69.88 <sup>b</sup>  | 81.99 <sup>a</sup> | 2.98             | *** |

549 <sup>†</sup> CRP = corncob powder-soybean molasses adsorbent; WB = wheat bran-soybean molasses adsorbent;  
550 RH = rice husk-soybean molasses adsorbent; DB = defat bran-soybean molasses adsorbent; SH =  
551 soybean hulls-soybean molasses adsorbent.

552 <sup>‡</sup> SEM was standard error of means.

553 <sup>§</sup> TVFA = total VFA.

554 <sup>a, b, c, d</sup> Means within a row for different soybean molasses adsorbed fermentation substrates that do not  
555 have a common superscript differ ( $P < 0.05$ ). \*  $P < 0.05$ ; \*\* $P < 0.01$ ; \*\*\* $P < 0.001$

556

557

558

559

560

561

562

563

564

565 **Table 5.** Effect of different soybean molasses adsorbed substrates on milking performance in different  
566 lactating period in dairy cows

| Items                        | Group <sup>†</sup> |                    |                    | SEM <sup>‡</sup> | P <sup>§</sup> |
|------------------------------|--------------------|--------------------|--------------------|------------------|----------------|
|                              | CG                 | WB                 | SH                 |                  |                |
| DMI (kg/d)                   | 14.82              | 15.02              | 14.93              | 0.321            | NS             |
| Milk Production (kg/d)       |                    |                    |                    |                  |                |
| Early lactation (0-100 d)    | 24.67              | 23.05              | 27.16              | 0.226            | NS             |
| Middle lactation (100-200 d) | 17.85              | 17.61              | 15.33              | 0.153            | NS             |
| Milk Fat (%)                 |                    |                    |                    |                  |                |
| Early lactation (0-100 d)    | 2.96 <sup>b</sup>  | 3.27 <sup>a</sup>  | 2.84 <sup>b</sup>  | 0.093            | **             |
| Middle lactation (100-200 d) | 3.13               | 3.05               | 3.07               | 0.064            | NS             |
| Milk Protein (%)             |                    |                    |                    |                  |                |
| Early lactation (0-100 d)    | 2.51 <sup>b</sup>  | 2.85 <sup>a</sup>  | 2.71 <sup>a</sup>  | 0.054            | **             |
| Middle lactation (100-200 d) | 2.93 <sup>b</sup>  | 3.10 <sup>a</sup>  | 3.09 <sup>a</sup>  | 0.068            | **             |
| Total Solids (%)             |                    |                    |                    |                  |                |
| Early lactation (0-100 d)    | 10.95 <sup>b</sup> | 11.63 <sup>a</sup> | 11.02 <sup>b</sup> | 0.178            | **             |
| Middle lactation (100-200 d) | 11.65              | 11.50              | 11.72              | 0.119            | NS             |

567 <sup>†</sup> CG was the control group without supplementation of soybean molasses; WB was the treatments that  
568 replaced 15% of corn meal by wheat bran-soybean molasses adsorbent; SH was the treatments that  
569 replaced 10% of what bran and 5% corn meal by wheat bran -soybean molasses adsorbent.

570 <sup>‡</sup>SEM was standard error of means.

571 <sup>§</sup> NS means the significance among three experimental treatments was not significant ( $P > 0.05$ ).

572 \*  $P < 0.05$ ; \*\* $P < 0.01$ ; \*\*\* $P < 0.001$

573

574

575

576

577

578

579

580 **Table 6.** Effects of different soybean molasses-adsorbents on plasma metabolites in different lactating  
581 period in dairy cows

| Item †                       | Group ‡             |                     |                      | SEM § | P ¶ |
|------------------------------|---------------------|---------------------|----------------------|-------|-----|
|                              | CG                  | WB                  | SH                   |       |     |
| GPT (U/L)                    |                     |                     |                      |       |     |
| Early Lactation (0-100 d)    | 14.43 <sup>b</sup>  | 19.00 <sup>a</sup>  | 19.16 <sup>a</sup>   | 0.88  | **  |
| Middle Lactation (100-200 d) | 14.64 <sup>b</sup>  | 19.36 <sup>a</sup>  | 19.00 <sup>a</sup>   | 1.65  | **  |
| AMY (U/L)                    |                     |                     |                      |       |     |
| Early Lactation (0-100 d)    | 72.85 <sup>b</sup>  | 143.25 <sup>a</sup> | 112.00 <sup>ab</sup> | 23.46 | **  |
| Middle Lactation (100-200 d) | 94.64 <sup>b</sup>  | 125.40 <sup>a</sup> | 109.15 <sup>ab</sup> | 19.53 | **  |
| LDH (U/L)                    |                     |                     |                      |       |     |
| Early Lactation (0-100 d)    | 741.67              | 771.56              | 774.50               | 31.00 | NS  |
| Middle Lactation (100-200 d) | 702.00 <sup>b</sup> | 848.54 <sup>a</sup> | 753.93 <sup>ab</sup> | 42.61 | **  |
| TP (g/L)                     |                     |                     |                      |       |     |
| Early Lactation (0-100 d)    | 74.78               | 76.38               | 74.88                | 10.25 | NS  |
| Middle Lactation (100-200 d) | 81.08 <sup>a</sup>  | 75.42 <sup>b</sup>  | 74.26 <sup>b</sup>   | 12.11 | **  |

582 † GPT = glutamic-pyruvic transaminase; AMY = amylase; LDH = lactate dehydrogenase; TP = total  
583 protein;

584 ‡ CG was the control group without supplementation of soybean molasses; WB was the treatments that  
585 replaced 15% of corn meal by wheat bran-soybean molasses adsorbent; SH was the treatments that  
586 replaced 10% of what bran and 5% corn meal by wheat bran-soybean molasses adsorbent.

587 § SEM was standard error of means.

588 ¶ NS means the significance among three experimental treatments was not significant ( $P > 0.05$ ).

589 \*  $P < 0.05$ ; \*\* $P < 0.01$ ; \*\*\* $P < 0.001$
